# Supplementary material for: Py-GC-MS Study on Catalytic Pyrolysis of Biocrude Obtained via HTL of Fruit Pomace
Source: MDPI journal article supplement (doi:10.3390/en14217288), 2021-11-03
Supplement: s1 [file s1]

---

*Supplementary Materials*

## **Py-GC-MS Study on Catalytic Pyrolysis of Biocrude Obtained via HTL of Fruit Pomace**

**Mariusz Wądrzyk <sup>1,2,\*</sup>, Marek Plata <sup>1</sup>, Kamila Zaborowska <sup>1</sup>, Rafał Janus <sup>1,2</sup> and Marek Lewandowski <sup>1,2</sup>**

<sup>1</sup> Faculty of Energy and Fuels, AGH University of Science and Technology, A. Mickiewicza Av. 30, 30-059 Kraków, Poland; mplata@agh.edu.pl (M.P.); kamila.kzaborowska@gmail.com (K.Z.); rjanus@agh.edu.pl (R.J.); lewandowski@agh.edu.pl (M.L.)

<sup>2</sup> AGH Centre of Energy, AGH University of Science and Technology, Czarnowiejska 36, 30-054 Kraków, Poland

\* Correspondence: wadrzyk@agh.edu.pl; Tel.: +48-12-617-38-90

**Table S1.** The mass of solid residue and share of identified products evolved after thermal and catalytic decomposition of the studied HTL biocrude.

| Name                                                                                                       | Pyrolysis 500 °C, 50 °C s <sup>-1</sup> |              |              |              |              |              |
|------------------------------------------------------------------------------------------------------------|-----------------------------------------|--------------|--------------|--------------|--------------|--------------|
|                                                                                                            | No Catalyst (Thermal)                   |              | ZSM-5        |              | HY           |              |
| <b>Share of total peak area of identified compounds on GC-MS chromatogram (<i>S<sub>identif</sub></i>)</b> | <b>85.9%</b>                            | <b>±5.1%</b> | <b>89.9%</b> | <b>±4.0%</b> | <b>96.0%</b> | <b>±0.9%</b> |
| Mass of solid residue in pyrolyzer (wt%) ( <i>m<sub>residue</sub></i> )                                    | 27.8%                                   | ±5.6%        | 23.5%        | ±3.5%        | 26.3%        | ±5.1%        |

**Table S2.** Comparison between the relative and estimated real share of group composition of the fractions evolved after thermal (500 °C) and catalytic pyrolysis of the studied HTL biocrude.

| Group Name                   | Relative Share Regarding to the Compounds Identified from GC-MS Analysis |        |        | Share Regarding to the Sample Subjected to Test (wt%) |        |        |
|------------------------------|--------------------------------------------------------------------------|--------|--------|-------------------------------------------------------|--------|--------|
|                              | No Catalyst (Thermal)                                                    | ZSM-5  | HY     | No Catalyst (Thermal)                                 | ZSM-5  | HY     |
| Aliphatic HC (unsaturated)   | 10.76%                                                                   | 32.81% | 33.40% | 6.67%                                                 | 22.57% | 23.61% |
| Aliphatic HC (saturated)     | —                                                                        | 0.73%  | 2.11%  | —                                                     | 0.50%  | 1.49%  |
| Cyclic HC                    | 5.72%                                                                    | 12.41% | 12.89% | 3.55%                                                 | 8.54%  | 9.11%  |
| Aromatic HC                  | 12.63%                                                                   | 23.26% | 25.76% | 7.84%                                                 | 16.00% | 18.21% |
| Carboxylic acids             | 19.27%                                                                   | 7.75%  | 1.07%  | 11.96%                                                | 5.33%  | 0.76%  |
| Esters                       | 22.63%                                                                   | 13.43% | 8.91%  | 14.04%                                                | 9.24%  | 6.30%  |
| Alcohols, ketones, aldehydes | 12.18%                                                                   | 6.38%  | 8.77%  | 7.56%                                                 | 4.39%  | 6.20%  |
| Phenol deriv.                | 6.49%                                                                    | 0.62%  | 1.65%  | 4.03%                                                 | 0.42%  | 1.17%  |
| N-compounds                  | 9.53%                                                                    | 0.81%  | 3.18%  | 5.91%                                                 | 0.55%  | 2.25%  |
| CO <sub>2</sub>              | 0.80%                                                                    | 1.87%  | 2.27%  | 0.49%                                                 | 1.29%  | 1.60%  |

**Table S3.** Identified volatile products evolved during thermal and catalytic pyrolysis of biocrude from blackcurrant pomace at 500 °C determined by Py-GC-MS.

| Group                      | RT<br>(min) | Compound Name                     | Pyrolysis 500 °C         |        |            |
|----------------------------|-------------|-----------------------------------|--------------------------|--------|------------|
|                            |             |                                   | No Catalyst<br>(Thermal) | ZSM-5  | Zeolite HY |
| CO <sub>2</sub>            | 3.0         | Carbon dioxide                    | 0.80%                    | 1.87%  | 2.27%      |
|                            | 3.1         | Propene                           | 1.90%                    | 10.67% | 7.20%      |
| Aliphatic HC (unsaturated) | 3.2         | 1-Propene, 2-methyl-              | 2.46%                    | 7.15%  | 4.56%      |
|                            | 3.6         | 2-Pentene                         | 3.22%                    | 4.65%  | 4.25%      |
|                            | 3.7         | 2-Butene, 2-methyl-               | 0.30%                    | 0.79%  | 2.25%      |
|                            | 4.3         | 1-Pentene, 2-methyl-              | —                        | —      | 1.56%      |
|                            | 4.5         | 2-Hexene-                         | 1.11%                    | 2.01%  | 3.77%      |
|                            | 5.2         | 1,3,5-Hexatriene, (Z)-            | 0.05%                    | 1.06%  | 0.87%      |
|                            | 5.6         | 4-Methyl-2-pentyne                | 0.26%                    | 0.26%  | 0.56%      |
|                            | 6.0         | 2,4-Hexadiene                     | 0.09%                    | 0.06%  | 1.03%      |
|                            | 4.7         | 2-Pentene, 3-methyl-              | —                        | 0.07%  | 0.16%      |
|                            | 6.5         | (Z)-2-Heptene                     | 0.76%                    | 0.81%  | —          |
|                            | 6.6         | 1,4-Pentadiene, 3,3-dimethyl-     | —                        | 1.18%  | 0.90%      |
|                            | 7.0         | 2-Heptene                         | —                        | 0.28%  | 0.20%      |
|                            | 7.4         | 3-Heptyne                         | —                        | —      | 0.16%      |
|                            | 8.7         | 2,3-Hexadiene, 2-methyl-          | —                        | 0.86%  | 0.97%      |
|                            | 10.3        | 1-Octene                          | 0.60%                    | 0.72%  | 1.02%      |
|                            | 10.6        | 4-Octene, (E)-                    | —                        | 0.11%  | 0.61%      |
|                            | 11.4        | 3-Octene, (Z)-                    | —                        | 0.25%  | 0.28%      |
|                            | 13.8        | 1-Nonyne                          | —                        | 0.07%  | 0.08%      |
|                            | 15.5        | 4-Nonene                          | —                        | 0.68%  | 0.74%      |
|                            | 20.0        | 5-Decene, (E)-                    | —                        | —      | 0.98%      |
|                            | 20.5        | 5-Decene                          | —                        | 0.22%  | 0.11%      |
|                            | 24.5        | 4-Octene, 2,3,6-trimethyl-        | —                        | 0.24%  | 0.28%      |
|                            | 27.8        | 4-Undecene, 5-methyl-             | —                        | 0.38%  | 0.63%      |
|                            | 31.4        | 2-Dodecene, 2-methyl-             | —                        | —      | 0.16%      |
|                            | 37.8        | 1-Tridecene                       | —                        | —      | 0.15%      |
|                            | 55.2        | 4-Hexadecen-6-yne, (Z)-           | —                        | 0.08%  | —          |
| Aliphatic HC (saturated)   | 6.5         | Heptane                           | —                        | —      | 0.69%      |
|                            | 15.6        | Nonan                             | —                        | 0.73%  | 1.01%      |
|                            | 38.0        | Undecane, 4,7-dimethyl-           | —                        | —      | 0.24%      |
|                            | 72.4        | Hexadecane                        | —                        | —      | 0.17%      |
| Cyclic HC                  | 3.8         | Cyclopropane, methylmethylene-    | 0.08%                    | 0.61%  | 0.78%      |
|                            | 3.9         | Cyclopentene                      | 0.10%                    | 0.42%  | 0.69%      |
|                            | 4.8         | Cyclopentene, 3-methyl-           | 0.92%                    | 0.27%  | —          |
|                            | 5.1         | 3-Vinyl-1-cyclobutene             | 0.16%                    | 0.74%  | 0.88%      |
|                            | 5.3         | Cyclopentene, 1-methyl-           | 0.16%                    | 0.81%  | 2.11%      |
|                            | 6.2         | Cyclopentane, 1,2-dimethyl-       | 0.63%                    | 0.62%  | 1.17%      |
|                            | 7.6         | Cyclopropane, trimethylmethylene- | 0.00%                    | 0.17%  | 0.00%      |
|                            | 8.5         | 1,3-Cycloheptadiene               | —                        | —      | 0.14%      |
|                            | 9.6         | 3-Methylenecyclohexene            | —                        | 2.14%  | 0.93%      |
|                            | 10.7        | Cyclopentane, 1,2,4-trimethyl-    | 0.48%                    | 1.81%  | 0.16%      |
|                            | 11.2        | Cyclohexene, 3-ethyl-             | —                        | 0.41%  | 0.25%      |
|                            | 12.4        | Cyclohexane, ethenylidene-        | —                        | 0.26%  | 0.11%      |
|                            | 12.6        | 1,3-Cyclohexadiene, 5-ethyl-      | —                        | 0.23%  | 0.37%      |
|                            | 12.9        | Cyclopentadiene, 2,5,5-trimethyl- | —                        | 0.73%  | 0.26%      |
|                            | 13.0        | 1-(2-Propenyl)cyclopentene        | —                        | 0.66%  | 0.38%      |
|                            | 13.4        | Cyclohexane, ethylidene-          | —                        | 0.20%  | 0.64%      |
|                            | 16.1        | Cyclopentane, ethylidene-         | —                        | 0.23%  | —          |
|                            | 16.5        | Tricyclo(4.2.2.0(1,5))decane      | —                        | —      | 0.06%      |

|                  |      |                                                  |        |       |       |
|------------------|------|--------------------------------------------------|--------|-------|-------|
| Aromatic HC      | 16.8 | Cyclohexene,1-propyl-                            | —      | —     | 0.15% |
|                  | 17.8 | Cyclopentene, 1-butyl-                           | —      | 0.29% | 0.63% |
|                  | 21.6 | Limonene                                         | 2.62%  | 1.69% | 2.83% |
|                  | 23.5 | 2,2-Dimethyl-3-vinyl-bicyclo(2.2.1)heptane       | —      | 0.12% | 0.18% |
|                  | 54.7 | Cyclohexane, 1,2,3,5-tetraisopropyl-             | 0.50%  | —     | 0.13% |
|                  | 5.5  | Benzene                                          | —      | 0.68% | 0.47% |
|                  | 9.2  | Toluene                                          | 2.78%  | 4.13% | 5.43% |
|                  | 13.7 | Ethylbenzene                                     | —      | 1.43% | 1.72% |
|                  | 14.2 | Xylenes                                          | —      | 2.84% | 4.31% |
|                  | 18.1 | Benzene, propyl-                                 | —      | 1.09% | 0.99% |
|                  | 18.6 | Benzene, 1-ethyl-4-methyl-                       | —      | 1.90% | 1.99% |
|                  | 18.9 | Benzene, 1,2,3-trimethyl-                        | —      | —     | 0.13% |
|                  | 19.3 | Benzene, 1-ethyl-2-methyl-                       | —      | —     | 0.05% |
|                  | 22.2 | Indene                                           | —      | 0.80% | 1.00% |
|                  | 22.6 | Benzene, n-butyl-                                | —      | —     | 0.71% |
|                  | 23.1 | Benzene, 1-methyl-4-propyl-                      | —      | —     | 0.23% |
|                  | 25.4 | Benzene, 4-ethenyl-1,2-dimethyl-                 | —      | 0.37% | 0.03% |
|                  | 26.2 | Benzene, 1-methyl-4-(1-methylpropyl)-            | —      | 0.16% | 0.07% |
|                  | 26.0 | Methano-indene, -tetrahydro-                     | —      | 0.36% | 0.52% |
|                  | 26.4 | 2-Methylindene                                   | —      | 0.42% | 1.95% |
|                  | 26.6 | Benzene, pentyl-                                 | —      | 1.17% | 1.70% |
|                  | 27.8 | Naphthalene                                      | —      | 0.11% | 1.30% |
|                  | 29.4 | Benzothiazole                                    | —      | —     | 0.05% |
|                  | 30.4 | Benzene, hexyl-                                  | —      | 0.49% | 0.51% |
|                  | 30.8 | 1H-Indene, 1,1-dimethyl-                         | —      | —     | 0.21% |
|                  | 32.3 | Naphthalene, 2-methyl-                           | —      | —     | 0.40% |
|                  | 31.7 | 1H-Indene, 1-ethylidene-                         | —      | —     | 0.18% |
|                  | 33.9 | Benzene, heptyl-                                 | —      | 0.47% | 0.46% |
|                  | 35.8 | Naphthalene, 1,2-dimethyl-                       | —      | —     | 0.18% |
|                  | 36.1 | Benzene, 1-pentyl-4-vinyl-                       | —      | —     | 0.18% |
|                  | 44.1 | Naphthalene, 1,2,3,4-tetrahydro-1-phenyl-        | 3.05%  | 3.92% | 0.44% |
|                  | 47.2 | Benzene, 1,1'-(2-butene-1,4-diyl)bis-            | —      | 0.05% | —     |
|                  | 48.9 | 2,5-Diphenyl-1,5-hexadiene                       | 0.96%  | 0.56% | 0.03% |
|                  | 50.9 | 1H-Indene, 1-(phenylmethylene)-                  | 0.37%  | —     | —     |
|                  | 51.2 | 1-(4-Methylphenyl)-4-phenylbuta-1,3-diene        | 0.38%  | 0.06% | —     |
|                  | 61.1 | Benzene, 1,1'-(1-butene-1,4-diyl)bis-, (Z)-      | 5.08%  | 2.26% | 0.50% |
| Carboxylic acids | 4.3  | Acetic acid                                      | 2.55%  | —     | —     |
|                  | 8.2  | 6-Nonynoic acid                                  | 0.29%  | —     | —     |
|                  | 15.7 | 8-Nonynoic acid                                  | 1.05%  | —     | —     |
|                  | 18.9 | Undec-10-ynoic acid                              | 0.06%  | —     | —     |
|                  | 34.7 | trans-Traumatic acid                             | —      | 0.36% | 0.78% |
|                  | 50.4 | n-Hexadecanoic acid                              | 3.15%  | 1.44% | —     |
|                  | 52.0 | 9-Hexadecenoic acid                              | —      | —     | 0.04% |
|                  | 54.5 | Linoelaidic acid                                 | 12.22% | 4.73% | 0.25% |
|                  | 54.6 | Oleic Acid                                       | 2.28%  | 1.00% | —     |
|                  | 55.0 | Octadecanoic acid                                | 0.10%  | —     | —     |
|                  | 56.0 | Gamolenic acid                                   | —      | 0.18% | —     |
|                  | 59.8 | cis-13-Eicosenoic acid                           | 0.12%  | —     | —     |
| Esters           | 4.7  | Methoxyacetic acid, methyl ester                 | 0.05%  | —     | —     |
|                  | 13.7 | (S)-Isopropyl lactate                            | 0.40%  | —     | —     |
|                  | 14.1 | 8-Nonynoic acid, methyl ester                    | 0.08%  | —     | —     |
|                  | 15.2 | Hexanoic acid, 2-phenylethyl ester               | 0.96%  | 1.10% | 1.63% |
|                  | 15.4 | 3-Cyclopentylpropionic acid, 2-phenylethyl ester | —      | 0.19% | —     |

|                              |       |                                                                                                                        |       |       |       |
|------------------------------|-------|------------------------------------------------------------------------------------------------------------------------|-------|-------|-------|
| Alcohols, ketones, aldehydes | 21.8  | Acetic acid, 2-methylene-bicyclo(3.2.1)oct-6-en-8-yl ester                                                             | —     | 0.78% | —     |
|                              | 24.4  | Pentanoic acid, 4-oxo-, 1-methylethyl ester                                                                            | 1.18% | —     | 0.62% |
|                              | 25.3  | Cyclopentanecarboxylic acid, 2-hydroxy-1-(2-propenyl)-, methyl ester, cis-                                             | 0.06% | —     | 0.08% |
|                              | 29.4  | Acetic acid, 7-hydroxy-1,3,4,5,6,7-hexahydro-2H-naphthalen-4a-ylmethyl ester                                           | —     | —     | 0.05% |
|                              | 30.1  | Succinic acid, non-5-yn-3-yl propyl ester                                                                              | 0.10% | —     | 0.42% |
|                              | ~33.0 | 2,5-Octadecadiynoic acid, methyl ester                                                                                 | 0.38% | 2.98% | 2.86% |
|                              | 43.5  | 5-Benzofuranacetic acid, 6-ethenyl-2,4,5,6,7,7a-hexahydro-3,6-dimethyl-.alpha.-methylene-2-oxo-, methyl ester          | 1.62% | 0.47% | —     |
|                              | 49.1  | Propanoic acid, 2-methyl-, (dodecahydro-6a-hydroxy-9a-methyl-3-methylene-2,9-dioxazuleno[4,5-b]furan-6-yl)methyl ester | 0.08% | 0.04% | —     |
|                              | 49.5  | 5,8,11-Heptadecatriynoic acid, methyl ester                                                                            | 0.40% | 0.22% | —     |
|                              | 51.8  | Isopropyl palmitate                                                                                                    | 3.63% | 1.65% | 0.62% |
|                              | 52.0  | 7-Methyl-Z-tetradecen-1-ol acetate                                                                                     | 1.08% | —     | —     |
|                              | 53.5  | 9,12-Octadecadienoic acid, methyl ester                                                                                | 1.58% | 0.12% | —     |
|                              | 53.6  | 9-Octadecenoic acid (Z)-, methyl ester                                                                                 | 0.25% | —     | —     |
|                              | 54.0  | Succinic acid, 3-methylbut-2-en-1-yl diphenylmethyl ester                                                              | 0.11% | —     | —     |
|                              | 55.3  | 9,12,15-Octadecatrienoic acid, 2,3-dihydroxypropyl ester                                                               | 0.21% | 0.16% | —     |
|                              | 55.6  | Isopropyl linoleate                                                                                                    | 7.50% | 4.45% | 0.98% |
|                              | 55.7  | Elaidic acid, isopropyl ester                                                                                          | 2.43% | —     | 0.04% |
|                              | 55.9  | cis-9-Octadecenoic acid, propyl ester                                                                                  | —     | 0.77% | 0.78% |
|                              | 56.3  | Isopropyl stearate                                                                                                     | 0.15% | 0.22% | —     |
|                              | 56.7  | 11,13-Dimethyl-12-tetradecen-1-ol acetate                                                                              | 0.30% | 0.16% | —     |
|                              | 57.6  | trans,trans-9,12-Octadecadienoic acid, propyl ester                                                                    | 0.09% | 0.11% | —     |
|                              | 87.8  | Octadecanoic acid, octadecyl ester                                                                                     | —     | —     | 0.76% |
|                              | 6.7   | Furan, 2,5-dimethyl-                                                                                                   | 0.62% | —     | —     |
|                              | 7.1   | 2,4-Hexadien-1-ol                                                                                                      | 0.16% | 0.81% | 0.46% |
|                              | 7.7   | 1-Butanol, 2-methyl-                                                                                                   | 0.13% | —     | 0.02% |
|                              | 7.8   | 2-Hydroxymethylcyclopentanol (trans)                                                                                   | 0.29% | —     | 0.03% |
|                              | 9.8   | 3-Cyclohexene-1-methanol                                                                                               | 0.05% | 0.10% | 0.09% |
|                              | 10.9  | Bicyclo[2.2.1]hept-2-en-7-ol                                                                                           | —     | 0.25% | 0.29% |
|                              | 11.0  | 1-Cyclohexene-1-methanol                                                                                               | 0.08% | 0.52% | 0.22% |
|                              | 11.5  | 2-Octyn-1-ol                                                                                                           | 0.18% | —     | —     |
|                              | 12.8  | 2,4-Pentadien-1-ol, 3-pentyl-, (2Z)-                                                                                   | —     | —     | 0.21% |
|                              | 13.4  | 1-Methoxymethoxy-hexa-2,4-diene                                                                                        | 0.03% | —     | —     |
|                              | 15.6  | 1-Octyn-3-ol, 4-ethyl-                                                                                                 | 0.31% | —     | —     |
|                              | 15.8  | 2-Cyclopenten-1-one, 2-methyl-                                                                                         | 0.70% | —     | —     |
|                              | 15.9  | cis,cis-4,6-Octadienol                                                                                                 | —     | —     | —     |
|                              | 16.3  | Cyclohexanol, 2-methylene-6-methyl-                                                                                    | —     | —     | 0.26% |
|                              | 16.6  | Campholenal                                                                                                            | —     | 0.17% | 0.05% |
|                              | 17.2  | Cyclohexaneethanol, 2-methylene-                                                                                       | 0.08% | 0.56% | 0.46% |
|                              | 18.1  | 3-Cyclohexene-1-propanal                                                                                               | 0.11% | 0.05% | 0.05% |
|                              | 18.8  | Cyclopentanol, 1-(1-methylene-2-propenyl)-                                                                             | 0.51% | —     | 0.15% |
|                              | 19.6  | 7-Oxabicyclo[4.1.0]heptane, 3-oxiranyl-                                                                                | —     | 0.41% | 0.11% |
|                              | 20.2  | 3-Cyclohexene-1-propanal                                                                                               | —     | 0.58% | 1.31% |
|                              | 20.8  | Verbenol                                                                                                               | 0.42% | 0.17% | 0.94% |
|                              | 21.2  | cis-Verbenol                                                                                                           | 0.57% | 0.18% | 0.60% |
|                              | 21.4  | Benzeneethanol, .beta.-ethenyl-.alpha.-phenyl-                                                                         | —     | —     | 0.35% |
|                              | 22.0  | 5,7-Octadien-3-ol, 2,4,4,7-tetramethyl-, (E)-                                                                          | 0.11% | —     | —     |

|               |      |                                                                                                    |       |       |       |
|---------------|------|----------------------------------------------------------------------------------------------------|-------|-------|-------|
|               | 22.5 | cis-(-)-1,2-Epoxy-p-menth-8-ene                                                                    | 0.07% | —     | 0.14% |
|               | 23.8 | (1R)-(-)-Myrtenal                                                                                  | —     | 0.38% | 0.56% |
|               | 24.0 | 2-Nonenal, (E)-                                                                                    | —     | —     | 0.32% |
|               | 24.2 | 2-Cyclopenten-1-one, 3,4,5-trimethyl-                                                              | —     | 0.21% | 0.14% |
|               | 24.8 | 1,4-dihydroxy-p-menth-2-ene                                                                        | 0.74% | 0.21% | 0.79% |
|               | 25.9 | 2,6-Dimethyl-1-nonen-3-yn-5-ol                                                                     | 1.53% | —     | 0.17% |
|               | 28.0 | 3-Heptyne-2,6-dione, 5-methyl-5-(1-methyl-ylethyl)-                                                | —     | 0.66% | 0.39% |
|               | 31.1 | Ethanone, 1-(1-hydroxy-2,6,6-trimethyl-2,4-cyclohexadien-1-yl)-                                    | 0.59% | 0.30% | 0.35% |
|               | 33.2 | Benzenemethanol, .alpha.-ethyl-4-methoxy-                                                          | —     | 0.08% | —     |
|               | 34.4 | cis,trans-5,9-Cyclododecadiene-cis-1,2-diol                                                        | —     | 0.21% | 0.21% |
|               | 35.1 | Falcarinol                                                                                         | —     | —     | 0.08% |
|               | 46.7 | 3-buten-2-one, 4-(5,5-dimethyl-1-ox-aspiro(2.5)oct-4-yl)                                           | 0.43% | 0.24% | —     |
|               | 49.9 | 2-[4-methyl-6-(2,6,6-trimethylcyclohex-1-en-1-yl)hexa-1,3,5-trienyl]cyclohex-1-en-1-carboxaldehyde | —     | 0.10% | —     |
|               | 55.1 | 1-Decanol, 2-hexyl-                                                                                | 1.23% | —     | —     |
|               | 58.3 | 1-Heptatriacotanol                                                                                 | 0.37% | 0.20% | —     |
|               | 69.3 | Methanocyclopenta(a)cyclopropa(e)cyclodecenone, octahydro-trihydroxy-bis(hydroxymethyl)-trimethyl- | 0.32% | —     | —     |
| Phenol deriv. | 19.7 | Phenol                                                                                             | 0.27% | —     | —     |
|               | 24.1 | Phenol, 2-methoxy-                                                                                 | 2.31% | 0.62% | 1.01% |
|               | 27.1 | Phenol, 4-ethyl                                                                                    | 0.81% | —     | 0.09% |
|               | 28.1 | 2-Methoxy-5-methylphenol                                                                           | 0.56% | —     | 0.11% |
|               | 31.1 | Phenol, 4-ethyl-2-methoxy-                                                                         | 1.78% | —     | 0.02% |
|               | 34.1 | Phenol, 2-methoxy-4-propyl-                                                                        | 0.77% | —     | 0.36% |
|               | 61.4 | 1-Propene, 3-(2-cyclopentenyl)-2-methyl-1,1-diphenyl-                                              | —     | —     | 0.05% |
| N-compounds   | 6.8  | 1H-Pyrazole, 1,5-dimethyl-                                                                         | —     | —     | 0.22% |
|               | 11.7 | Pyrazine, methyl-                                                                                  | 1.25% | —     | 0.52% |
|               | 12.0 | 4-Aminopyridine                                                                                    | 0.34% | 0.54% | 0.02% |
|               | 12.9 | 6-Heptene-1-nitrile                                                                                | 0.39% | —     | —     |
|               | 16.1 | Pyrimidine, 4,6-dimethyl-                                                                          | 1.30% | —     | 0.05% |
|               | 16.3 | Pyrrolidine, 2-(cyanomethylene)-                                                                   | 1.10% | —     | 0.05% |
|               | 20.1 | Phenprobamate                                                                                      | —     | —     | 1.31% |
|               | 20.7 | 1H-Indazole, 4,5,6,7-tetrahydro-                                                                   | 0.25% | —     | 0.12% |
|               | 21.2 | 1,2,5-Trimethylpyrrole                                                                             | —     | —     | 0.12% |
|               | 25.6 | 1H-Pyrrole, 3-ethyl-2,4,5-trimethyl-                                                               | —     | —     | 0.24% |
|               | 26.3 | 2,5-Pyrrolidinedione, 1,3-diethyl-3-methyl-                                                        | 0.44% | —     | —     |
|               | 28.6 | 4-(2,5-Dihydro-3-methoxyphenyl)butylamine                                                          | —     | —     | 0.06% |
|               | 30.8 | 4-Isopropenyl-1-methylbicyclo(4.1.0)heptan-2-one oxime                                             | 0.36% | —     | —     |
|               | 31.3 | 2,4-Imidazolidinedione, 1-methyl-                                                                  | —     | —     | 0.43% |
|               | 34.4 | N-(2-Hydroxyethyl)succinimide                                                                      | 0.47% | —     | —     |
|               | 34.7 | 1-(Piperidin-1-yl)hexadecan-1-one                                                                  | 1.08% | —     | 0.04% |
|               | 36.9 | Acetamide, N-methyl-N-(4-(3-hydroxypyrrolidinyl)-2-butyryl)-                                       | —     | 0.24% | —     |
|               | 37.4 | 2-Pyrrolidinone, 5-(cyclohexylmethyl)-                                                             | 1.54% | —     | —     |
|               | 44.3 | 2-Cyclohexylpiperidine                                                                             | 0.29% | —     | —     |
|               | 46.4 | Cyclopropa(d)naphthalen-3-one, octahydro-2,4a,8,8-tetramethyl-, oxime                              | —     | 0.02% | —     |
|               | 50.7 | 2,3-Diazabicyclo(2.2.1)hept-2-ene, 1,4-diphenyl-                                                   | 0.62% | —     | —     |

|      |                                                         |       |   |   |
|------|---------------------------------------------------------|-------|---|---|
| 52.2 | Pyrrolidine, 1-(4-(4-chlorophenyl)-3-phenyl-2-butenyl)- | 0.10% | — | — |
|------|---------------------------------------------------------|-------|---|---|

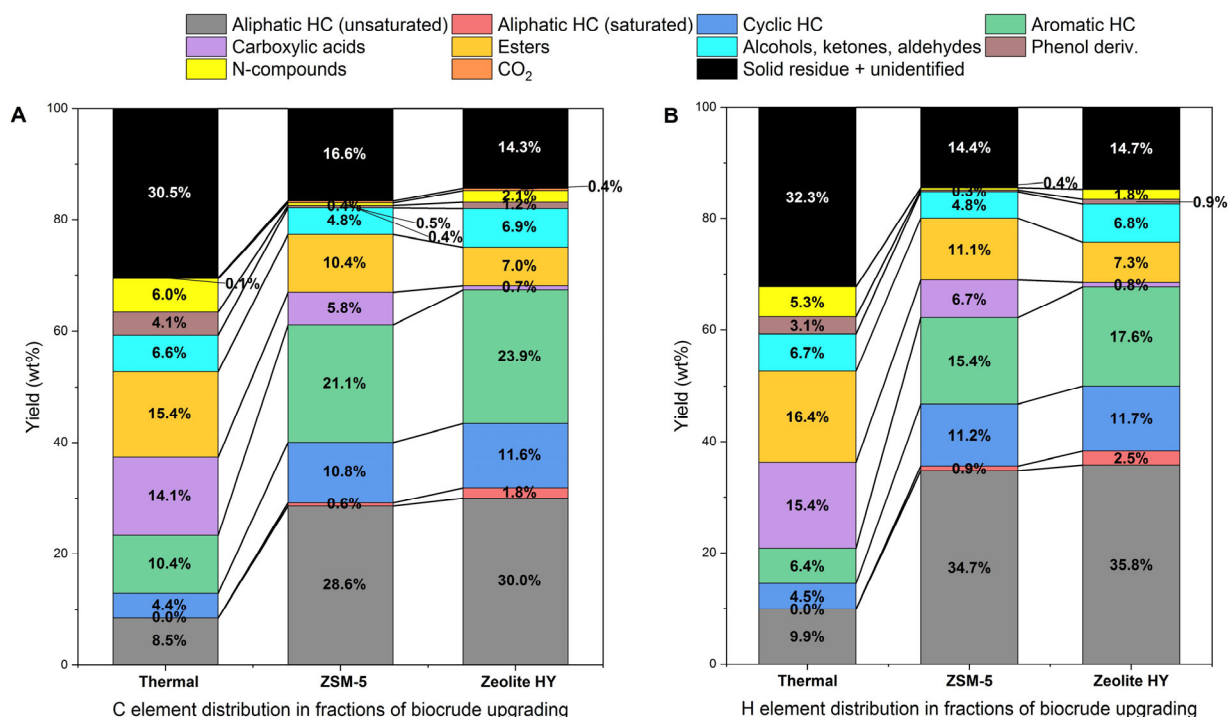

**Figure S1.** C and H elements distribution in the products of thermal and catalytic cracking of HTL biocrude calculated based on the Py-GC-MS analyses (A) C element distribution, (B) H element distribution.

$$C_{distr} = (C_{mpd_{real}} \times C_{share\_mpd} \times (1 - m_{residue}) \times S_{ident}) / C_{biocrude}$$

where:

$C_{distr}$  - means the relative share of element C in particular compound detected after thermal/catalytic cracking;

$C_{mpd_{real}}$  - the relative share of particular compound (Table A3);

$C_{share\_mpd}$  - the share of C element in particular compound;

$m_{residue}$  - mass of residue after test (Table A2);

$S_{ident}$  - share of total peak area of identified compounds on GC-MS chromatogram;

$C_{biocrude}$  - C element content in biocrude subjected to upgrading;

$$H_{distr} = (C_{mpd_{real}} \times H_{share\_mpd} \times (1 - m_{residue}) \times S_{ident}) / H_{biocrude}$$

where:

$H_{distr}$  - means the relative share of element H in particular compound detected after thermal/catalytic cracking;

$C_{mpd_{real}}$  - the relative share of particular compound (Table A3);

$H_{share\_mpd}$  - the share of H element in particular compound;

$m_{residue}$  - mass of residue after test (Table A2);

$S_{ident}$  - share of total peak area of identified compounds on GC-MS chromatogram;

$H_{biocrude}$  - H element content in biocrude subjected to upgrading.
